# Supplementary material for: Photon-Counting Detector CT Virtual Monoenergetic Images in Cervical Trauma Imaging—Optimization of Dental Metal Artifacts and Image Quality
Source: MDPI journal article supplement (doi:10.3390/diagnostics14060626), 2024-03-15
Supplement: s1 [file s1]

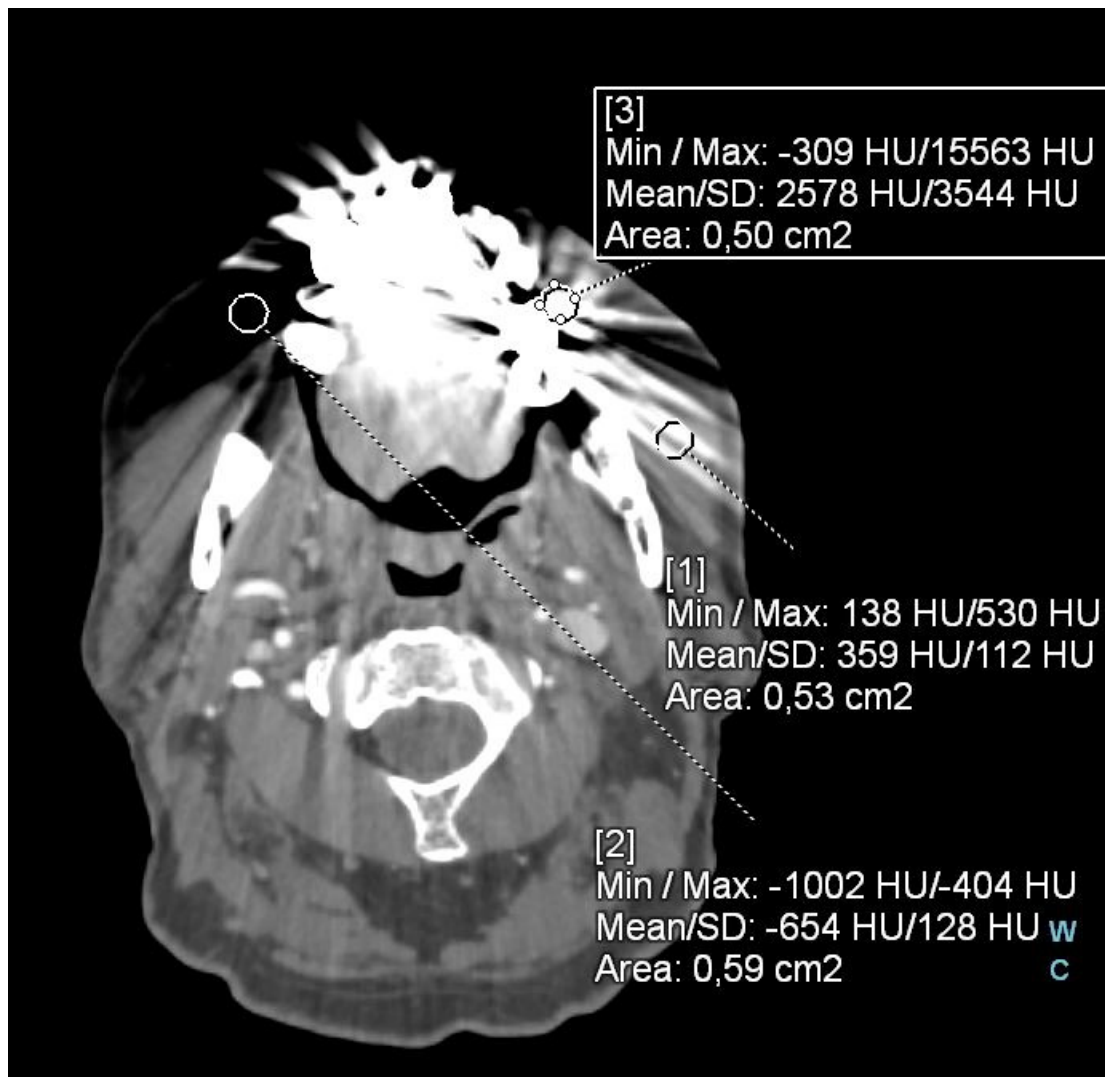

Supplemental Figure S1 shows the placement of the different ROIs (ROI 1: muscle artifacts, ROI 2: hypoattenuation artifact, ROI 3: hyperattenuation artifact); the ROIs of non-affected areas and vascular structures are not demonstrated on this slice; the readers were free to pick the slice that was the most appropriate.
